# Supplementary material for: Microleakage of Restorative Materials Used for Temporization of Endodontic Access Cavities
Source: MDPI journal article supplement (doi:10.3390/jcm12144762), 2023-07-18

**S2.** Sample agar plates showing the minimum inhibitory concentrations of ampicillin and ciprofloxacin

a) MIC of ampicillin and ciprofloxacin against *S. mutans*:

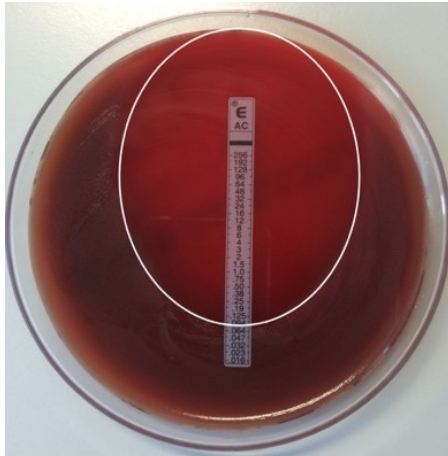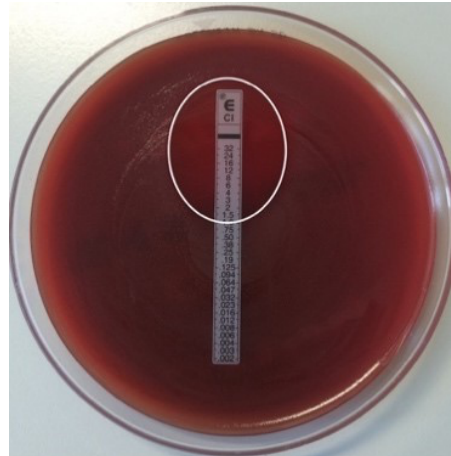

b) MIC of ampicillin and ciprofloxacin against *A. actinomycetemcomitans*:

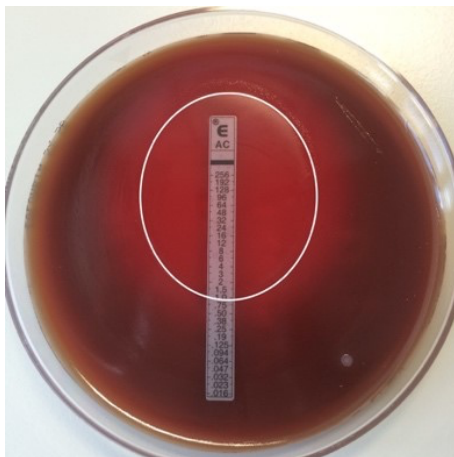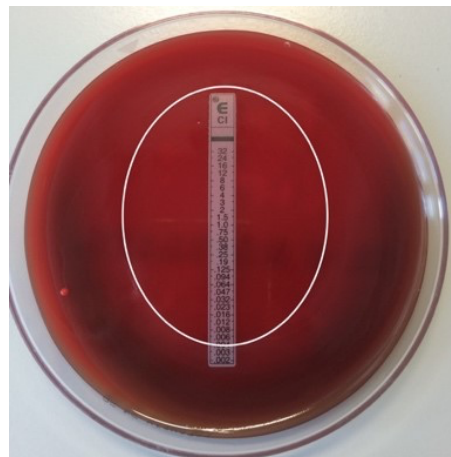

c) MIC of ampicillin and ciprofloxacin against *MRSA*:

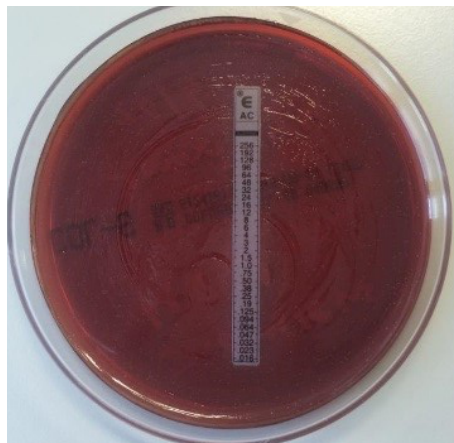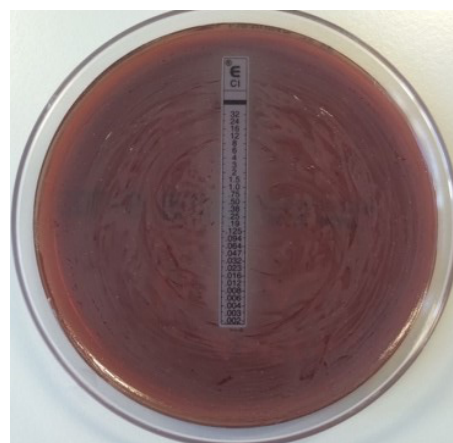

Supplement: s1 [file s1]
