# Supplementary figures and images for: Microleakage of Restorative Materials Used for Temporization of Endodontic Access Cavities
Source: MDPI journal article supplement (doi:10.3390/jcm12144762), 2023-07-18

**S1.** Dimensions of the conical cylinder used for standardized access openings

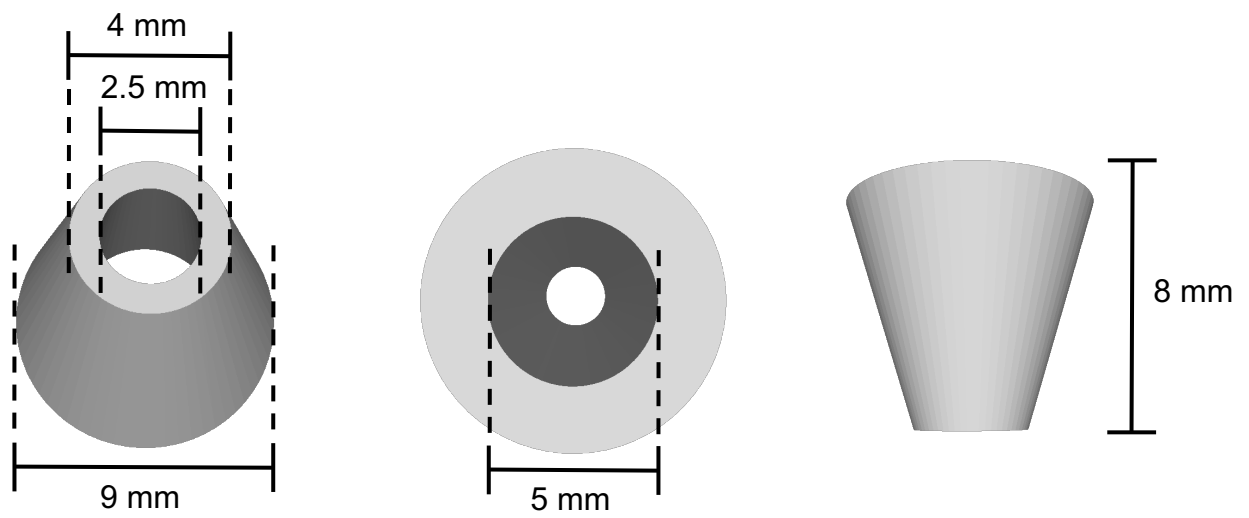

Supplement: s1 [file s1]
